# Supplementary material for: The Oregon Child Absenteeism Due to Respiratory Disease Study (ORCHARDS): Rationale, Objectives, and Design
Source: bioRxiv or medRxiv preprint supplement (doi:10.1101/2021.02.01.21250878), 2021-02-04
Supplement: Supplementary file [file media-2.pdf]

# ORCHARDS HOUSEHOLD STUDY FORM

School ID: \_\_\_\_\_

Participant ID: \_\_\_\_\_

**NASAL SWAB**

**ID**

HOUSEHOLD MEMBER NAME: \_\_\_\_\_

RELATIONSHIP TO STUDENT: \_\_\_\_\_

Age: \_\_\_\_\_

Do you work outside the home? Yes No

Number of bedrooms: \_\_\_\_\_

Gender: F M

Do you attend school? Yes No

Do you attend Daycare? Yes No

-----  
-Did you receive an influenza vaccine this year (after August 1, 2019)? Yes No

Have you had cold or flu-like symptoms in the past 7 days? Yes No (if No, then you are done until next week)

If yes: How many days ago did your symptoms start? \_\_\_\_\_

How severe are/were your symptoms? Mild Moderate Severe

What symptoms have you had in the past 7 days? (circle all that have been present)

|           |            |          |               |                  |
|-----------|------------|----------|---------------|------------------|
| Fever     | Chills     | Cough    | Runny Nose    | Sore Throat      |
| Tiredness | Body Aches | Headache | Poor Appetite | Nasal Congestion |

Were you seen by a healthcare provider? Yes No Where? Usual Clinic Urgent Care ER

What diagnosis were you given? \_\_\_\_\_

Were you given an antibiotic or antiviral medication? Yes No \_\_\_\_\_

Were you sent to the hospital? Yes No

Did you miss school or Work? Yes No If yes, how many days did you miss? \_\_\_\_\_

-----  
Have you had cold or flu-like symptoms in the past 7 days (since our previous visit)? Yes No

If yes: How many days ago did your symptoms start? \_\_\_\_\_

How severe are/were your symptoms? Mild Moderate Severe

What symptoms have you had in the past 7 days? (circle all that have been present)

|           |            |          |               |                  |
|-----------|------------|----------|---------------|------------------|
| Fever     | Chills     | Cough    | Runny Nose    | Sore Throat      |
| Tiredness | Body Aches | Headache | Poor Appetite | Nasal Congestion |

Were you seen by a healthcare provider? Yes No Where? Usual Clinic Urgent Care ER

What diagnosis were you given? \_\_\_\_\_

Were you given an antibiotic or antiviral medication? Yes No \_\_\_\_\_

Were you sent to the hospital? Yes No

Did you miss school or Work? Yes No If yes, how many days did you miss? \_\_\_\_\_

**TODAY**  
Day 0 ( \_\_\_ / \_\_\_ / \_\_\_ )

**TODAY**

**FOLLOW-UP**  
Day 7 ( \_\_\_ / \_\_\_ / \_\_\_ )

**FOLLOW-UP**
